# Supplementary material
Source: publisher figshare collection journal article supplement (https://karger.figshare.com/ndownloader/files/38288502)
Supplement: Supplementary file 1 [file 38288502]

**Supplemental Table 1**. Baseline and follow-up urine data (n=203).

|  | Pre-treatment | Follow-up | p value |
| --- | --- | --- | --- |
| Urine volume (L/day) | 2.0 (0.8) | 2.4 (0.9) | <0.001 |
| Urine sodium (mEq/day) | 178 (74) | 168 (68) | 0.08 |
| Urine calcium (mg/day) | 254 (126) | 201 (120) | <0.001 |
| Urine oxalate (mg/day) | 41 (16) | 42 (16) | 0.57 |
| Urine citrate (mg/day) | 569 (327) | 552 (323) | 0.32 |
| Urine phosphate (g/day) | 1.0 (0.3) | 1.0 (0.3) | 0.11 |
| Urine creatinine (mg/day) | 1607 (448) | 1797 (2560) | 0.29 |
| Supersaturation calcium oxalate | 8.0 (3.6) | 5.4 (3.2) | <0.001 |
| Supersaturation calcium phosphate | 1.4 (0.9) | 1.0 (0.8) | <0.001 |

Data presented as mean (standard deviation)
